# Supplementary material
Source: Springer Nature journal article supplement (https://www.springermedizin.de/resource/supplementary/12913_2009_1052_MOESM2_ESM.pdf/9536222)
Supplement: MOESM2 [file 9536222]

**Participants in 12 FGDs**

**4 FGDs  $\geq$  60  
years old**

**2 Male  
resident**

**2 Female  
resident**

**8 FGDs of 15~60  
years old**

**4 employed**

**2 Male  
resident**

**2 Female  
resident**

**4 unemployed**

**2 Male  
resident**

**2 Female  
resident**
